# Supplementary material for: Isoliquiritigenin Inhibits Ovarian Cancer Metastasis by Reversing Epithelial-to-Mesenchymal Transition
Source: PubMed Central journal article supplement (PMC6833095; doi:10.3390/molecules24203725), 2019-10-16
Supplement: molecules-24-03725-s001.pdf [file molecules-24-03725-s001.pdf]

## SUPPLEMENTARY INFORMATION

### *Primer sequences for PCR*

Vimentin forward 5'- AATGACCGCTTCGCCAACT-3'

Reverse 5'- ATCTTATTCTGCTGCTCCAGGAA-3'

E-cadherin forward 5'- ACAGCCCCGCCTTATGATT-3'

Reverse 5'- TCGGAACCGCTTCCTTCA-3'

Zeb1 forward 5'-CACCATCCCCATCACCTCTAA-3'

reverse 5'-GCACCCTCAGCTGTGTACAAGT-3'

Zeb2 forward 5'-GCCGAGTCCATGCGAACT-3'

Reverse 5'-CCATGATCGGCTGCTTCAT-3'

N-cadherin forward 5'-CCTCCAGAGTTTACTGCCATGAC-3'

Reverse 5'-GTAGGATCTCCGCCACTGATTC-3'

twist1 forward 5'-GCCAGGTACATCGACTTCCTCT-3'

Reverse 5'-TCCATCCTCCAGACCGAGAAGG-3'

$\beta$ -actin forward 5'- CCAGCT CACCATGGAT GATG-3';

Reverse 5'- GACAAC GGCTCCGGCA T-3'.
